# Supplementary material for: N-doped carbon nanocages with high catalytic activity and durability for oxygen reduction
Source: Royal Society of Chemistry journal article supplement (doi:10.1039/c5ta02009c), 2015-01-01
Supplement: c5ta02009c1.pdf [file c5ta02009c1.pdf]

## Supporting information

N-doped carbon nanocages with high catalytic activity and durability  
for oxygen reduction

Xiao Xia Wang, Biao Zou, Xin Xin Du, and Jian Nong Wang\*

Nano-X Research Center, School of Mechanical and Power Engineering,  
East China University of Science and Technology,  
130 Meilong Road, Shanghai 200237,  
P. R. China.

Tel: +86-21-64252360. E-mail: [jnwang@ecust.edu.cn](mailto:jnwang@ecust.edu.cn)

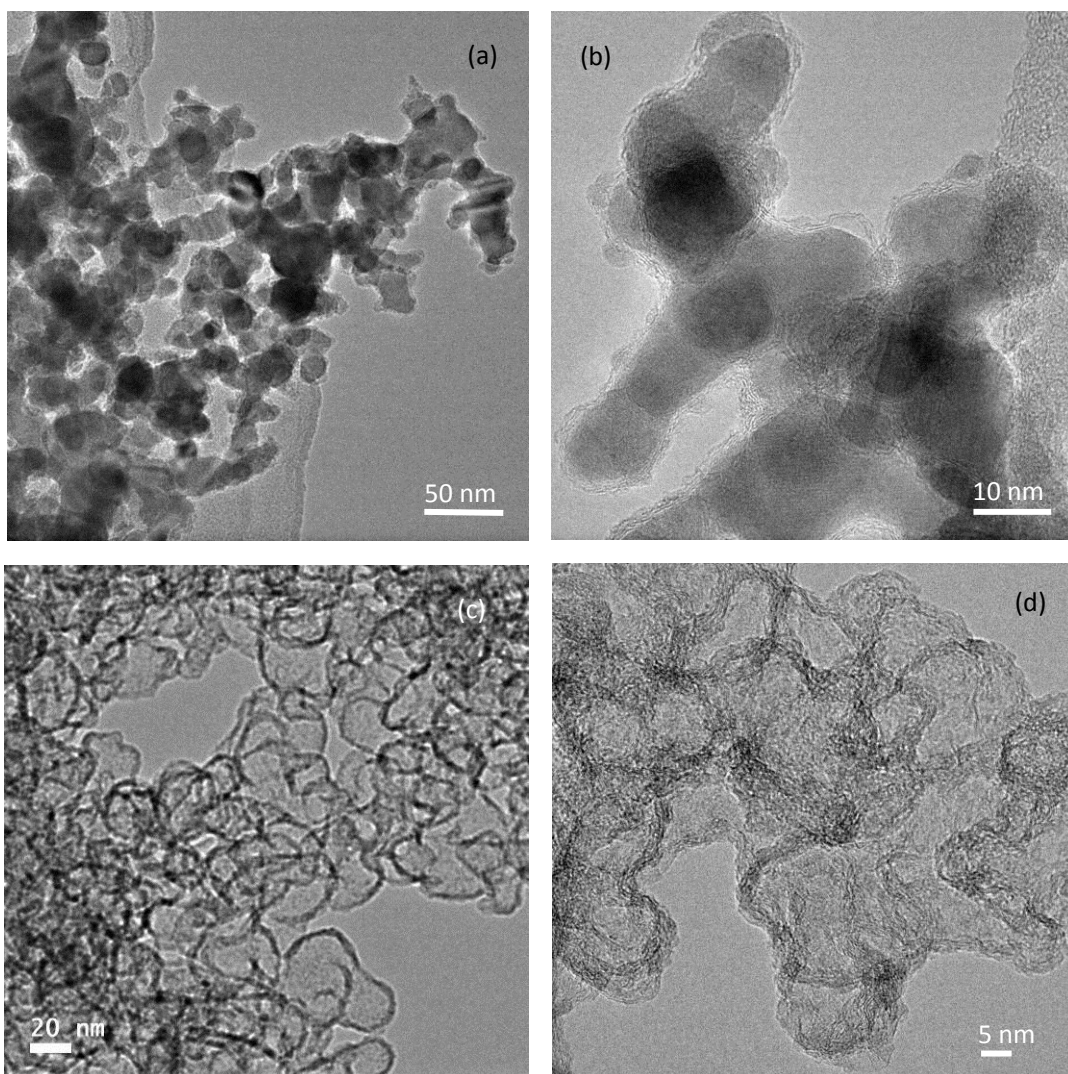

**Fig. S1.** TEM images of the as-prepared NCNC at 500 °C before acid washing (a, b), and NCNC5-800 (c, d)

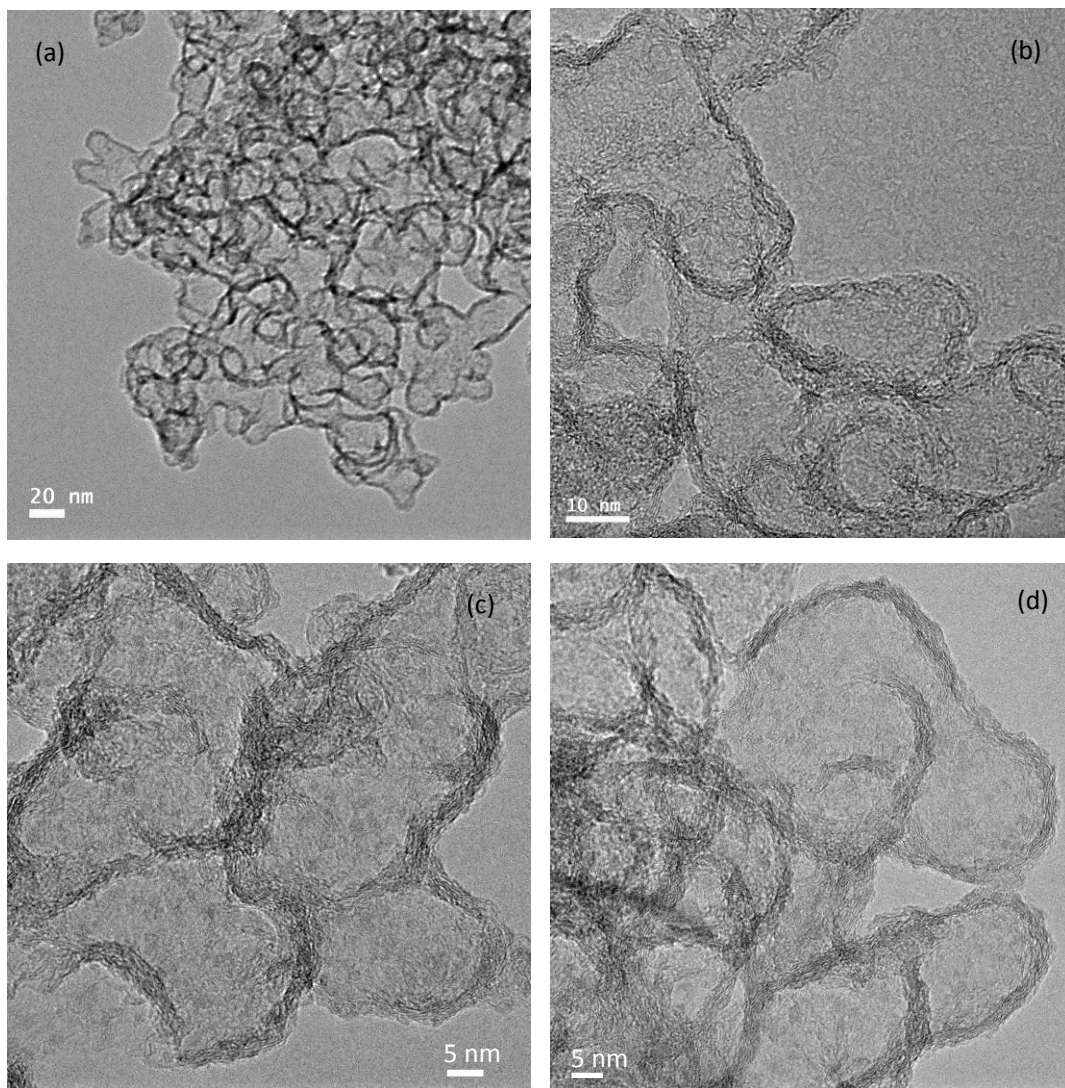

**Fig. S2.** TEM images of NCNC6 (a, b) and NCNC6-800 (c, d)

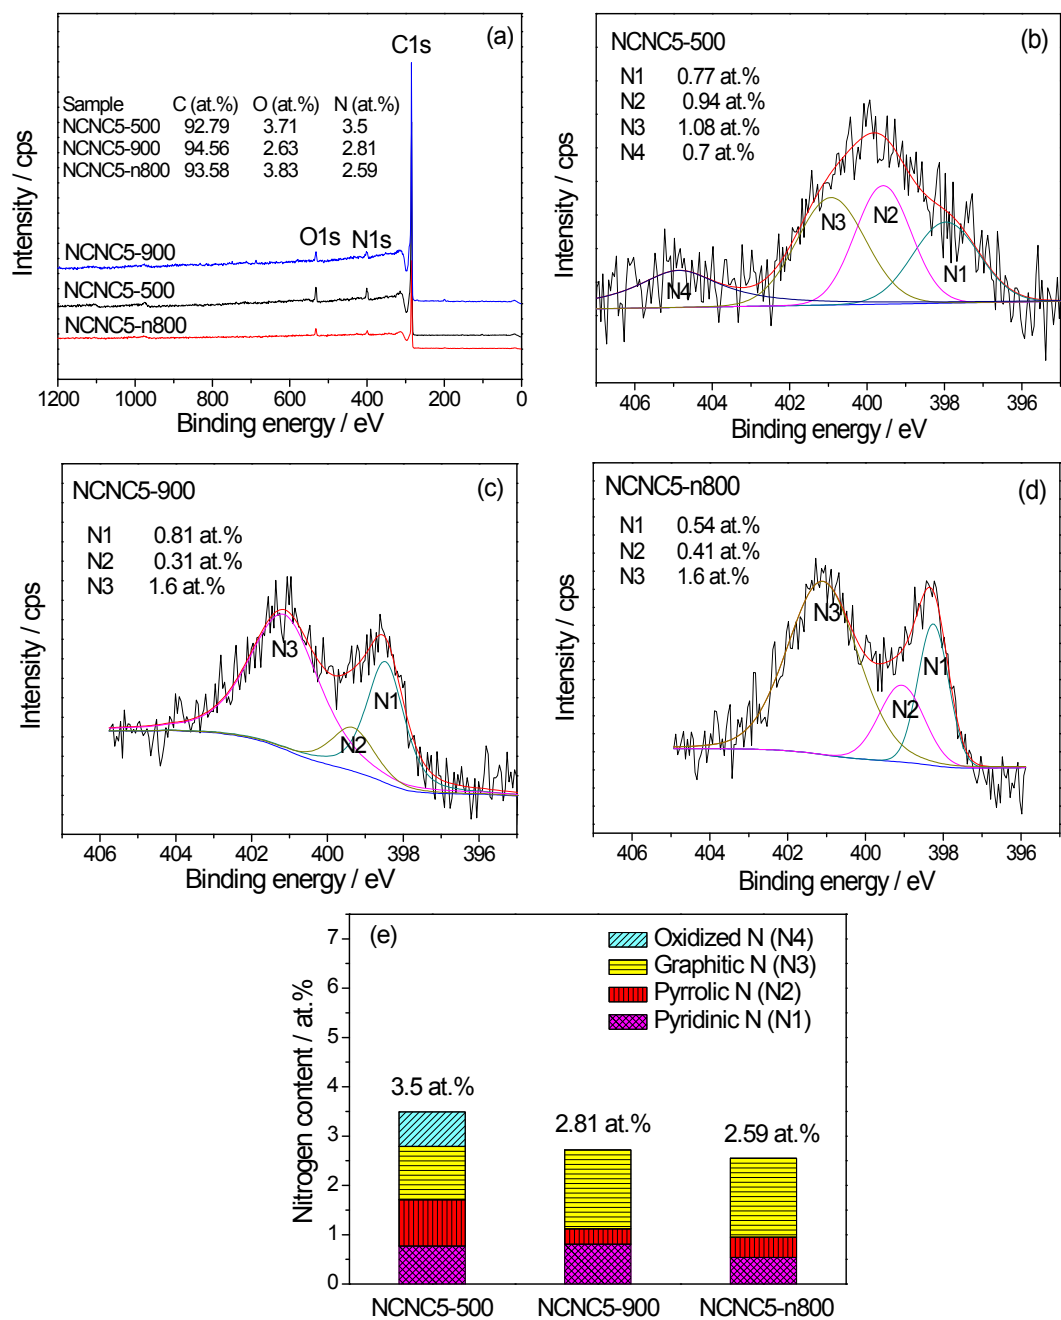

**Fig. S3.** XPS survey spectra of different samples (a), high resolution N 1s spectra of NCNC5-500 (b), NCNC5-900 (c), and NCNC5-n800 (d), and the contents of different types of N in different NCNCs (e).

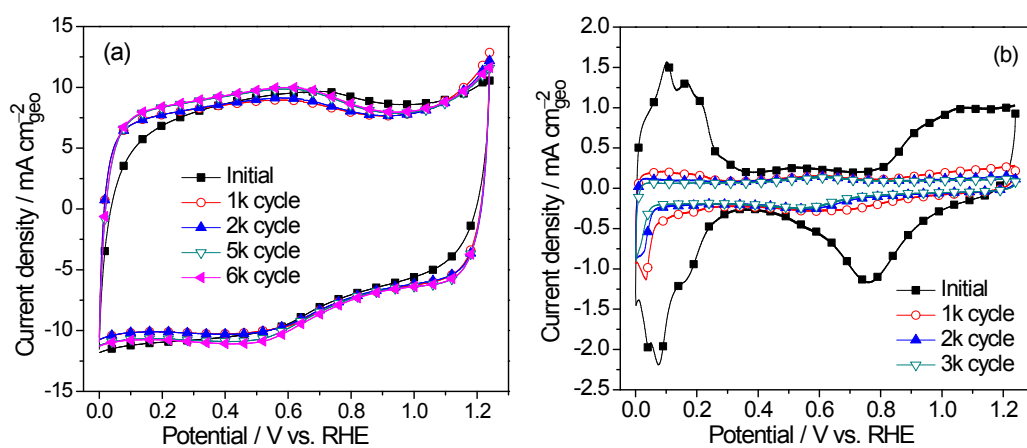

**Fig. S4** Cyclic voltammogram curves of NCNC5-800 (a), and JM catalysts (b) after different numbers of potential cycling between 0.6 and 1.24 V (vs. RHE)

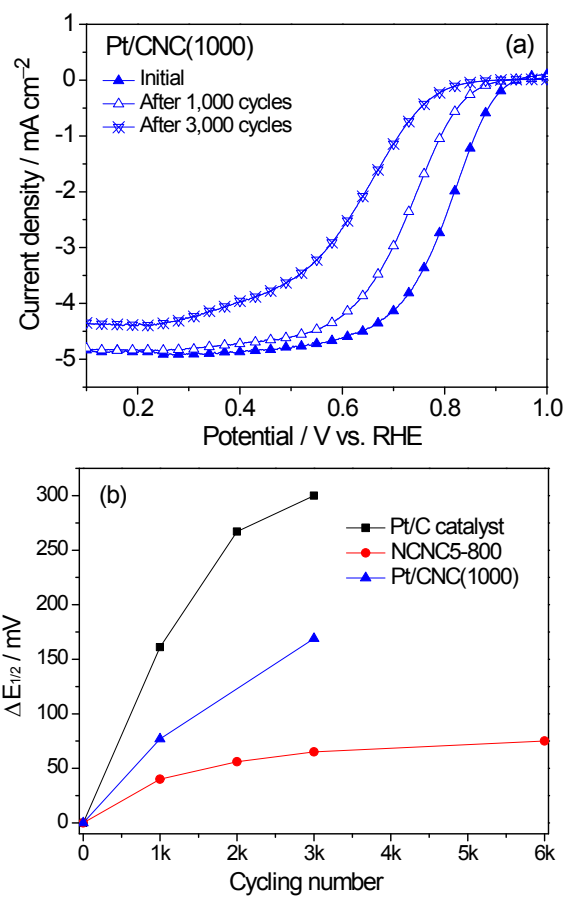

**Fig. S5.** RDE polarization curves of Pt/CNC(1000) (a) before and after potential cycling between 0.6 to 1.24 V (vs. RHE) in O<sub>2</sub>-saturated 0.5 M H<sub>2</sub>SO<sub>4</sub>, and the difference between initial E<sub>1/2</sub> and E<sub>1/2</sub> after different numbers of potential cycling (b).

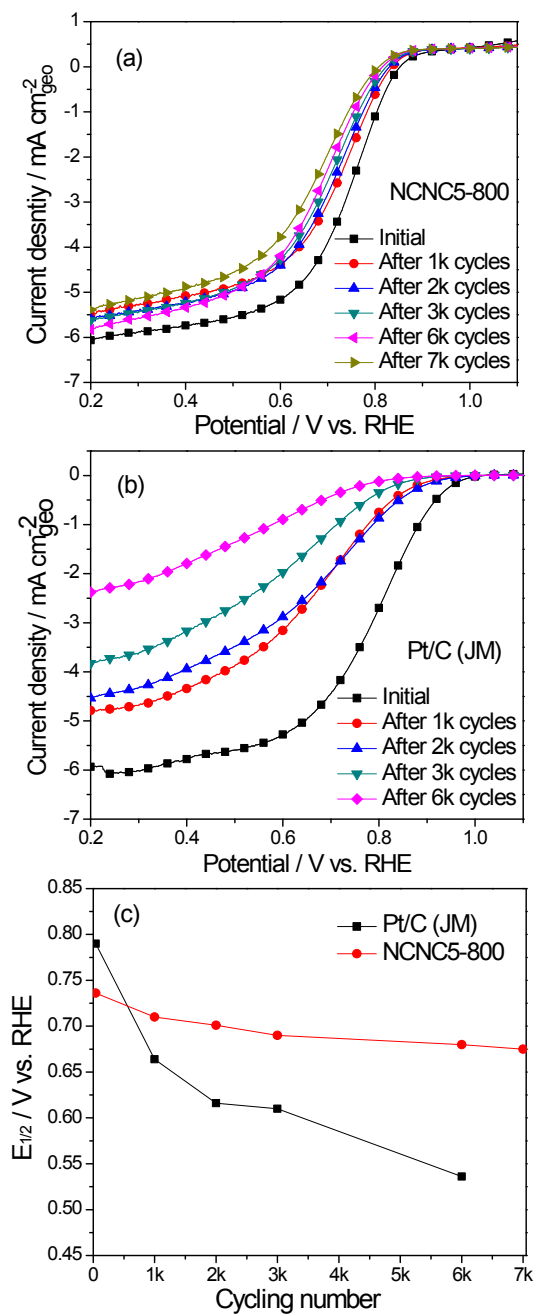

**Fig. S6.** RDE polarization curves of NCNC5-800 (a) and JM (b) catalysts before and after potential cycling between 0.66 to 1.3 V (vs. RHE) in O<sub>2</sub>-saturated 0.1 M HClO<sub>4</sub>, (rotating speed: 1600 rpm, scan rate: 5 mV s<sup>-1</sup>), and the variation of half-wave potential with the cycling number for NCNC5-800 and JM Pt/C catalyst (c).

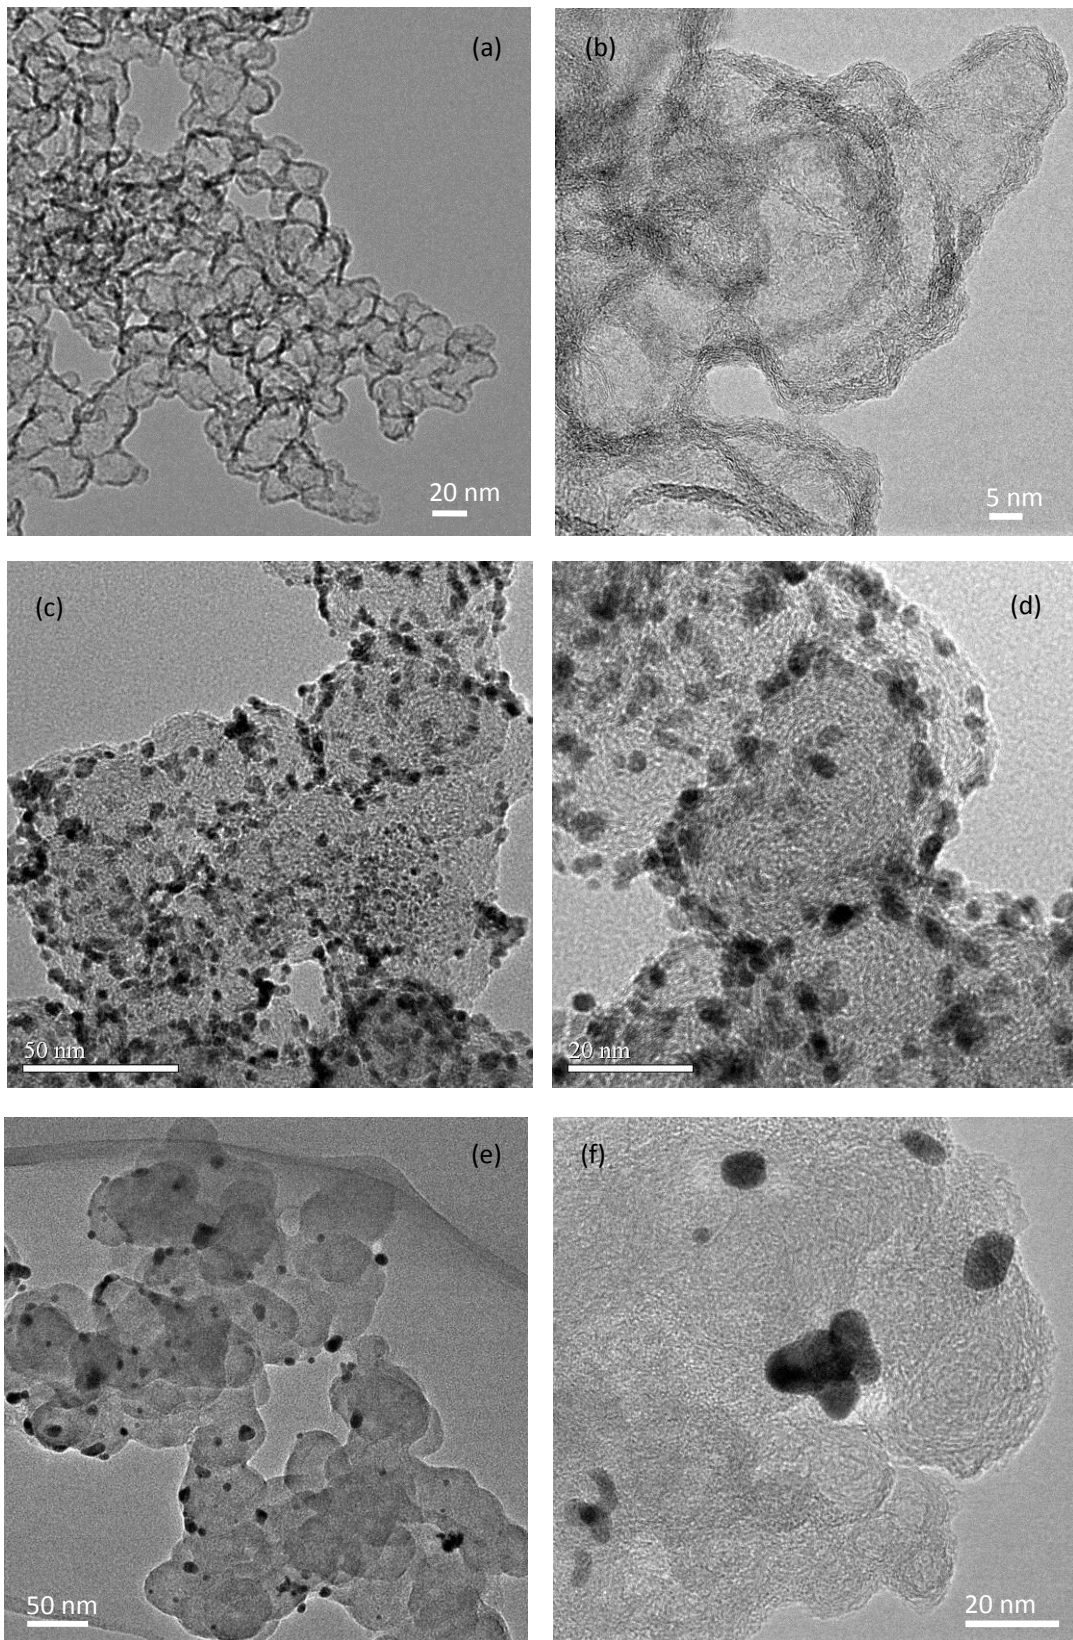

**Fig. S7.** TEM images of NCNC5-800 after 7000 potential cycles in 0.1 M HClO<sub>4</sub> (a, b), TEM images of Pt/C before (c, d) and after 6000 potential cycles (e, f)



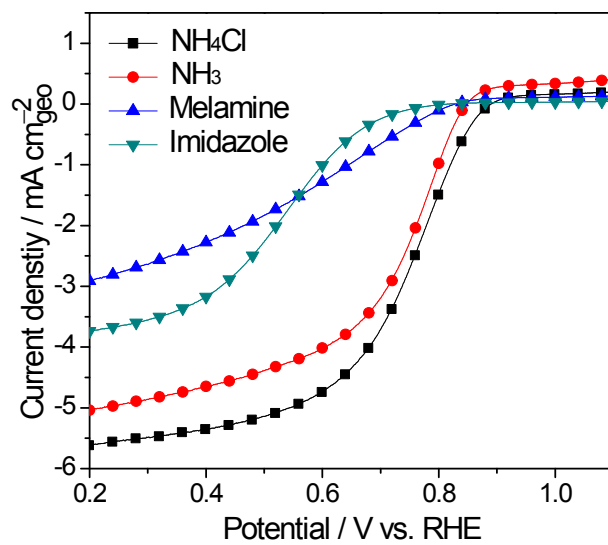

**Fig. S8.** RDE polarization curves of NCNC5 heated at 800 °C with different N-containing chemicals in O<sub>2</sub>-saturated 0.1 M HClO<sub>4</sub> (rotating speed: 1600 rpm, scan rate: 5 mV s<sup>-1</sup>).
